# Supplementary material for: Niobium doped hexagonal mesoporous silica (HMS-X) catalyst for vapor phase Beckmann rearrangement reaction
Source: Royal Society of Chemistry journal article supplement (doi:10.1039/c3ra41840e), 2013-09-25
Supplement: c3ra41840e.pdf [file c3ra41840e.pdf]

## Supporting Information

### Niobium doped Hexagonal Mesoporous Silica (HMS-X) Catalyst for Vapor Phase Beckmann Rearrangement Reaction

Sandip Mandal<sup>1</sup>, Chiranjit Santra<sup>1</sup>, Rawesh Kumar<sup>1</sup>, Malay Pramanik<sup>2</sup>, Sumbul Rahman<sup>1</sup>, Asim Bhaumik<sup>\*2</sup>, Sudip Maity<sup>3</sup>, Debasis Sen<sup>4</sup> and Biswajit Chowdhury<sup>\*1</sup>,

1. Department of Applied Chemistry, Indian School of Mines, Dhanbad, India
2. Department of Material Science, Indian Association for Cultivation of Science, Jadavpur, Kolkata, India
3. Central Institute of Mining and Fuel Research, Dhanbad, India
4. Solid State Physics Division, Bhabha Atomic Research Center, India

\*Corresponding author: biswajit\_chem2003@yahoo.com; Tel: (+91)-326-2235663; Fax: (+91)-326-2296563

### Table of content

|                                                                                                       |   |
|-------------------------------------------------------------------------------------------------------|---|
| 1. Elemental mapping obtained from the selected region of the three Nb doped HMS-X catalysts -----    | 2 |
| 2. Synthesis of Nb-MCM-41 catalyst -----                                                              | 3 |
| 3. Synthesis of Nb-HMS-3 catalyst -----                                                               | 3 |
| 4. FT-IR spectra of (a) Nb-HMS-X (Si/Nb = 13) and (b) Silylated Nb-HMS-X (Si/Nb = 13) catalysts ----- | 4 |
| 5. The gel composition and thermal treatment of different catalysts-----                              | 4 |

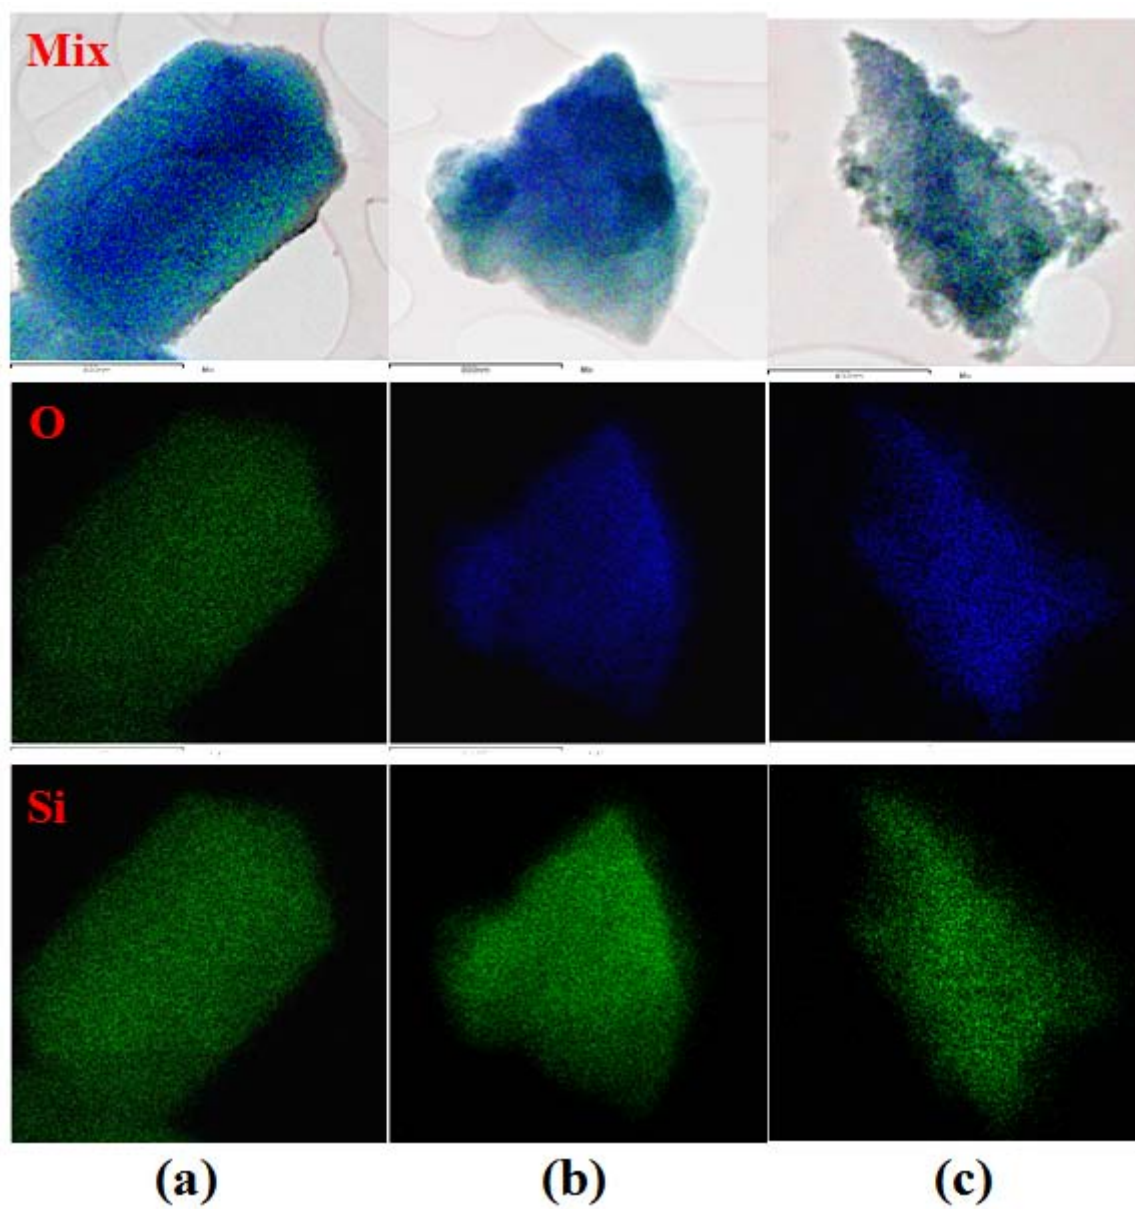

**Fig. 1** Elemental mapping obtained from the selected region of the (a) Nb-HMS-X (Si/Nb = 13), (b) Nb-HMS-X (Si/Nb=3) and (c) Nb-HMS-X (Si/Nb=2)

### **Synthesis of Nb-MCM-41 catalyst:**

Nb-MCM-41 material was synthesized by using Cetyl trimethylammonium bromide (CTAB) as a template under basic condition. In this procedure CTAB (Acros) (9.11 g) was dissolved in 162 ml deionized water and stirred the solution for 15 min. Tetraethyl orthosilicate (20.83 g) (TEOS, Acros) was added to the CTAB solution and stirring was continued for 15 min. After that ethanolic solution of Niobium Pentachloride (2.02 g) (Aldrich) was added to this solution and stirring was continued for 1h. The resulting gel composition of the mixture is  $\text{CTAB} : \text{H}_2\text{O} : \text{TEOS} : \text{NbCl}_5 = 0.025 : 9 : 0.1 : 0.0075$  (molar ratio) . After 1 h stirring aqueous NaOH solution was added to the solution until pH attained to 8-8.5. The final mixture was vigorously stirred for 1 h and the autoclaved at 353 K for 3 days. After hydrothermal treatment the material was filtered and washed several time by deionized water and dried in air. After drying the material was calcined at 703 K for 8 h. The final material obtained after calcinations were Nb-MCM-41 and stored in vacuum desicator.

### **Synthesis of Nb-HMS-3 catalyst:**

Nb-HMS-3 material was synthesized by using Cetyl trimethylammonium bromide (CTAB) as a template under basic condition. In this procedure CTAB (Acros) (15.3 g) was added to a mixture of water (729 g) and ethanol (306.6 g), and then pH of the solution was maintained at 12.4 by adding aqueous  $\text{NH}_3$  solution. Then the solution was stirred at 277 K for 30 min. Tetraethyl orthosilicate (20.83 g) (TEOS, Acros) and ethanolic solution of Niobium Pentachloride (2.02 g) (Aldrich) was added to the CTAB solution and stirring was continued for another 3 h at 277 K temperature. The resulting gel composition of the mixture is  $\text{CTAB} : \text{H}_2\text{O} : \text{EtOH} : \text{TEOS} : \text{NbCl}_5 = 0.042 : 40.89 : 6.66 : 0.01 : 0.0075$  (molar ratio). The resulting slurry was refrigerated for 16 h and the precipitated material was collected by filtration, and washed several time by deionized water. After washing the material was calcined at 698 K

for 8 h. The final material obtained after calcinations were Nb-HMS-3 and stored in vacuum desicator.

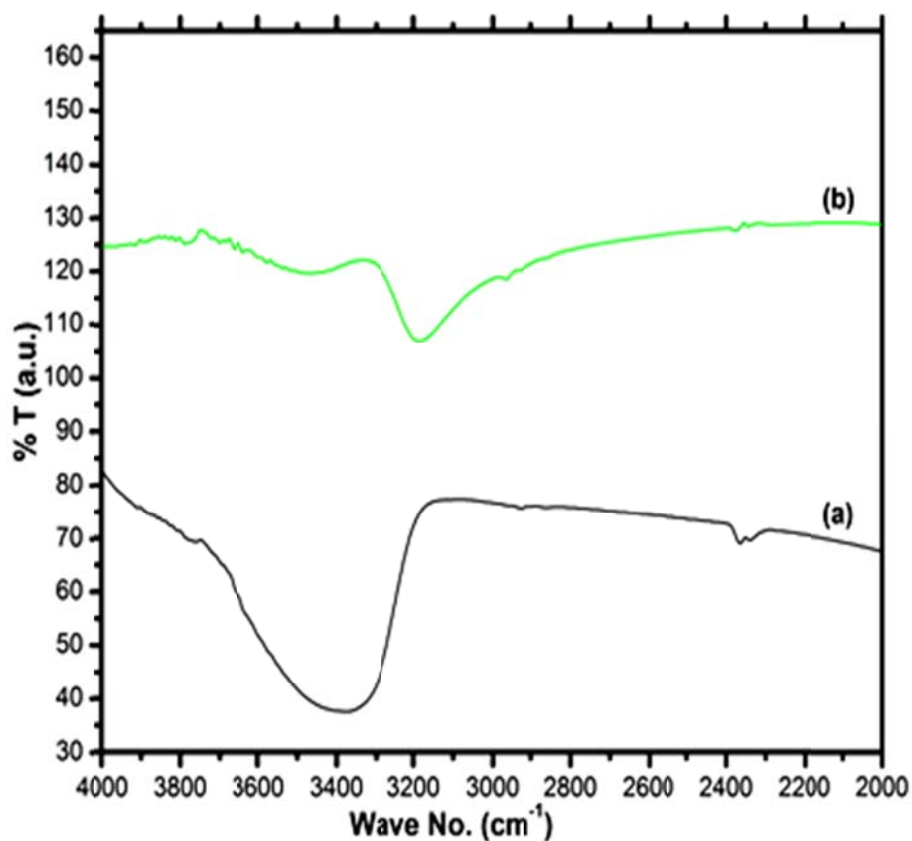

**Fig. 2** FT-IR spectra of (a) Nb-HMS-X (Si/Nb = 13), (b) Silylated Nb-HMS-X (Si/Nb = 13) catalyst

**Table S1** The gel composition and thermal treatment of different catalysts

| Catalyst             | Gel composition (mol %)                                              | Hydro thermal<br>temp. (°C) | Drying temp.<br>(°C) | Calcination<br>temp. (°C) |
|----------------------|----------------------------------------------------------------------|-----------------------------|----------------------|---------------------------|
|                      | P123 : H <sub>2</sub> O : HCl : n-Butanol : TEOS : NbCl <sub>5</sub> |                             |                      |                           |
| KIT-6                | 0.017 : 200 : 5.4 : 1.325 : 1                                        | 100                         | 100                  | 540                       |
| Nb-KIT-6 (Si/Nb=20)  | 0.017 : 200 : 5.4 : 1.325 : 1 : 0.050                                | 100                         | 100                  | 540                       |
| Nb-KIT-6 (Si/Nb=13)  | 0.017 : 200 : 5.4 : 1.325 : 1 : 0.075                                | 100                         | 100                  | 540                       |
| Nb-KIT-6 (Si/Nb=3)   | 0.017 : 200 : 5.4 : 1.325 : 1 : 0.3                                  | 100                         | 100                  | 540                       |
| Nb-KIT-6 (Si/Nb=2)   | 0.017 : 200 : 5.4 : 1.325 : 1 : 0.45                                 | 100                         | 100                  | 540                       |
|                      |                                                                      |                             |                      |                           |
| Nb-HMS-3 (Si/Nb=13)  | CTAB : H <sub>2</sub> O : EtOH : TEOS : NbCl <sub>5</sub>            | -                           | -                    | 425                       |
|                      | 0.042 : 40.89 : 6.66 : 0.01 : 0.0075                                 |                             |                      |                           |
|                      |                                                                      |                             |                      |                           |
| Nb-MCM-41 (Si/Nb=13) | CTAB : H <sub>2</sub> O : TEOS : NbCl <sub>5</sub>                   | 80                          | 100                  | 430                       |
|                      | 0.025 : 9 : 0.1 : 0.0075                                             |                             |                      |                           |
